# Supplementary material for: Sequence and structure based models of HIV-1 protease and reverse transcriptase drug resistance
Source: PubMed Central journal article supplement (PMC3849442; doi:10.1186/1471-2164-14-s4-s3), 2013-10-01
Supplement: 1471-2164-14-S4-S3-S1.pdf [file 1471-2164-14-S4-S3-S1.pdf]

Additional file 1. BER and AUC performance measures associated with RF and SVM classification, using TSM, All, and IAS sets to construct mutant feature vectors

| Drug                                  | RF   |      |      |      |      |      | SVM  |      |      |      |      |      | Drug Mean |      |
|---------------------------------------|------|------|------|------|------|------|------|------|------|------|------|------|-----------|------|
|                                       | TSM  |      | All  |      | IAS  |      | TSM  |      | All  |      | IAS  |      |           |      |
|                                       | BER  | AUC  | BER  | AUC  | BER  | AUC  | BER  | AUC  | BER  | AUC  | BER  | AUC  | BER       | AUC  |
| Protease Inhibitors                   |      |      |      |      |      |      |      |      |      |      |      |      |           |      |
| APV                                   | 0.32 | 0.91 | 0.32 | 0.92 | 0.31 | 0.91 | 0.38 | 0.88 | 0.35 | 0.89 | 0.37 | 0.86 | 0.34      | 0.90 |
| ATV                                   | 0.29 | 0.90 | 0.29 | 0.89 | 0.29 | 0.88 | 0.40 | 0.82 | 0.41 | 0.79 | 0.42 | 0.80 | 0.35      | 0.85 |
| IDV                                   | 0.28 | 0.93 | 0.28 | 0.93 | 0.27 | 0.93 | 0.29 | 0.90 | 0.29 | 0.91 | 0.28 | 0.88 | 0.28      | 0.91 |
| LPV                                   | 0.25 | 0.94 | 0.24 | 0.94 | 0.26 | 0.94 | 0.34 | 0.88 | 0.35 | 0.89 | 0.34 | 0.88 | 0.30      | 0.91 |
| NFV                                   | 0.22 | 0.93 | 0.20 | 0.94 | 0.22 | 0.92 | 0.24 | 0.90 | 0.23 | 0.90 | 0.24 | 0.90 | 0.23      | 0.92 |
| RTV                                   | 0.18 | 0.96 | 0.18 | 0.96 | 0.19 | 0.96 | 0.26 | 0.92 | 0.29 | 0.92 | 0.25 | 0.92 | 0.23      | 0.94 |
| SQV                                   | 0.27 | 0.94 | 0.26 | 0.95 | 0.26 | 0.94 | 0.27 | 0.93 | 0.26 | 0.93 | 0.27 | 0.92 | 0.27      | 0.94 |
| TPV                                   | 0.61 | 0.95 | 0.67 | 0.94 | 0.61 | 0.90 | 0.31 | 0.80 | 0.37 | 0.86 | 0.21 | 0.91 | 0.46      | 0.89 |
| AVG                                   | 0.30 | 0.93 | 0.31 | 0.93 | 0.30 | 0.92 | 0.31 | 0.88 | 0.32 | 0.89 | 0.30 | 0.88 | 0.31      | 0.91 |
| Nucleoside / Nucleotide RT Inhibitors |      |      |      |      |      |      |      |      |      |      |      |      |           |      |
| 3TC                                   | 0.16 | 0.99 | 0.18 | 0.98 | 0.17 | 0.98 | 0.21 | 0.96 | 0.18 | 0.95 | 0.21 | 0.96 | 0.19      | 0.97 |
| ABC                                   | 0.29 | 0.86 | 0.29 | 0.85 | 0.29 | 0.85 | 0.31 | 0.83 | 0.34 | 0.80 | 0.33 | 0.82 | 0.31      | 0.84 |
| AZT                                   | 0.31 | 0.91 | 0.31 | 0.89 | 0.30 | 0.90 | 0.33 | 0.88 | 0.26 | 0.91 | 0.34 | 0.87 | 0.31      | 0.89 |
| d4T                                   | 0.23 | 0.90 | 0.29 | 0.89 | 0.31 | 0.87 | 0.23 | 0.89 | 0.23 | 0.85 | 0.28 | 0.89 | 0.26      | 0.88 |
| ddC                                   | 0.24 | 0.88 | 0.29 | 0.88 | 0.22 | 0.89 | 0.32 | 0.83 | 0.30 | 0.84 | 0.32 | 0.82 | 0.28      | 0.86 |
| ddI                                   | 0.29 | 0.86 | 0.33 | 0.86 | 0.30 | 0.80 | 0.25 | 0.85 | 0.30 | 0.79 | 0.26 | 0.80 | 0.29      | 0.83 |
| FTC                                   | 0.14 | 1.00 | 0.14 | 1.00 | 0.00 | 1.00 | 0.19 | 0.91 | 0.25 | 0.88 | 0.14 | 0.91 | 0.14      | 0.95 |
| TDF                                   | 0.45 | 0.87 | 0.46 | 0.89 | 0.50 | 0.77 | 0.47 | 0.78 | 0.44 | 0.76 | 0.56 | 0.61 | 0.48      | 0.78 |
| AVG                                   | 0.26 | 0.91 | 0.29 | 0.91 | 0.26 | 0.88 | 0.29 | 0.87 | 0.29 | 0.85 | 0.31 | 0.84 | 0.28      | 0.87 |
| Nonnucleoside RT Inhibitors           |      |      |      |      |      |      |      |      |      |      |      |      |           |      |
| DLV                                   | 0.32 | 0.87 | 0.35 | 0.88 | 0.35 | 0.86 | 0.32 | 0.86 | 0.35 | 0.84 | 0.32 | 0.87 | 0.34      | 0.86 |
| EFV                                   | 0.20 | 0.94 | 0.25 | 0.92 | 0.21 | 0.92 | 0.28 | 0.88 | 0.33 | 0.85 | 0.32 | 0.87 | 0.27      | 0.90 |
| NVP                                   | 0.31 | 0.91 | 0.35 | 0.92 | 0.29 | 0.90 | 0.36 | 0.86 | 0.41 | 0.82 | 0.35 | 0.87 | 0.35      | 0.88 |
| AVG                                   | 0.28 | 0.91 | 0.32 | 0.91 | 0.28 | 0.89 | 0.32 | 0.87 | 0.36 | 0.84 | 0.33 | 0.87 | 0.32      | 0.88 |
