# Supplementary material for: Sequence and structure based models of HIV-1 protease and reverse transcriptase drug resistance
Source: PubMed Central journal article supplement (PMC3849442; doi:10.1186/1471-2164-14-s4-s3), 2013-10-01
Supplement: 1471-2164-14-S4-S3-S2.pdf [file 1471-2164-14-S4-S3-S2.pdf]

Additional file 2. RF classification OOB values, using TSM, All, and IAS sets to construct mutant feature vectors

| RF                                    |      |      |      |           |
|---------------------------------------|------|------|------|-----------|
| Drug                                  | TSM  | All  | IAS  | Drug Mean |
| Protease Inhibitors                   |      |      |      |           |
| APV                                   | 0.24 | 0.20 | 0.23 | 0.22      |
| ATV                                   | 0.29 | 0.26 | 0.32 | 0.29      |
| IDV                                   | 0.23 | 0.23 | 0.24 | 0.23      |
| LPV                                   | 0.23 | 0.21 | 0.23 | 0.22      |
| NFV                                   | 0.21 | 0.19 | 0.23 | 0.21      |
| RTV                                   | 0.14 | 0.16 | 0.16 | 0.15      |
| SQV                                   | 0.18 | 0.17 | 0.19 | 0.18      |
| TPV                                   | 0.21 | 0.19 | 0.21 | 0.20      |
| AVG                                   | 0.22 | 0.20 | 0.23 | 0.21      |
| Nucleoside / Nucleotide RT Inhibitors |      |      |      |           |
| 3TC                                   | 0.13 | 0.15 | 0.11 | 0.13      |
| ABC                                   | 0.33 | 0.34 | 0.30 | 0.32      |
| AZT                                   | 0.26 | 0.25 | 0.26 | 0.26      |
| d4T                                   | 0.23 | 0.24 | 0.28 | 0.25      |
| ddC                                   | 0.20 | 0.24 | 0.22 | 0.22      |
| ddI                                   | 0.26 | 0.24 | 0.27 | 0.26      |
| FTC                                   | 0.08 | 0.10 | 0.08 | 0.09      |
| TDF                                   | 0.29 | 0.26 | 0.33 | 0.29      |
| AVG                                   | 0.22 | 0.23 | 0.23 | 0.23      |
| Nonnucleoside RT Inhibitors           |      |      |      |           |
| DLV                                   | 0.24 | 0.26 | 0.27 | 0.26      |
| EFV                                   | 0.18 | 0.21 | 0.18 | 0.19      |
| NVP                                   | 0.17 | 0.16 | 0.14 | 0.16      |
| AVG                                   | 0.20 | 0.21 | 0.20 | 0.20      |
