# Supplementary material for: Sequence and structure based models of HIV-1 protease and reverse transcriptase drug resistance
Source: PubMed Central journal article supplement (PMC3849442; doi:10.1186/1471-2164-14-s4-s3), 2013-10-01
Supplement: 1471-2164-14-S4-S3-S3.pdf [file 1471-2164-14-S4-S3-S3.pdf]

Additional file 3.  $r^2$  and mse performance measures associated with REPTree and SVR regression, using TSM, All, and IAS sets to construct mutant feature vectors

| Drug                                  | REPTree |      |       |      |       |      | SVR   |      |       |      |       |      | Drug Mean |      |
|---------------------------------------|---------|------|-------|------|-------|------|-------|------|-------|------|-------|------|-----------|------|
|                                       | TSM     |      | All   |      | IAS   |      | TSM   |      | All   |      | IAS   |      |           |      |
|                                       | $r^2$   | mse  | $r^2$ | mse  | $r^2$ | mse  | $r^2$ | mse  | $r^2$ | mse  | $r^2$ | mse  |           |      |
| Protease Inhibitors                   |         |      |       |      |       |      |       |      |       |      |       |      |           |      |
| APV                                   | 0.70    | 0.24 | 0.71  | 0.23 | 0.70  | 0.23 | 0.62  | 0.29 | 0.59  | 0.31 | 0.58  | 0.32 | 0.65      | 0.27 |
| ATV                                   | 0.61    | 0.30 | 0.68  | 0.26 | 0.62  | 0.30 | 0.59  | 0.31 | 0.58  | 0.31 | 0.51  | 0.37 | 0.60      | 0.31 |
| IDV                                   | 0.78    | 0.17 | 0.78  | 0.18 | 0.76  | 0.18 | 0.73  | 0.20 | 0.73  | 0.20 | 0.70  | 0.23 | 0.75      | 0.19 |
| LPV                                   | 0.78    | 0.24 | 0.77  | 0.24 | 0.79  | 0.22 | 0.69  | 0.34 | 0.69  | 0.34 | 0.64  | 0.38 | 0.73      | 0.29 |
| NFV                                   | 0.79    | 0.21 | 0.80  | 0.19 | 0.77  | 0.22 | 0.77  | 0.23 | 0.75  | 0.25 | 0.73  | 0.26 | 0.77      | 0.23 |
| RTV                                   | 0.81    | 0.22 | 0.84  | 0.18 | 0.78  | 0.25 | 0.77  | 0.26 | 0.80  | 0.23 | 0.68  | 0.37 | 0.78      | 0.25 |
| SQV                                   | 0.69    | 0.37 | 0.70  | 0.35 | 0.66  | 0.40 | 0.75  | 0.29 | 0.77  | 0.26 | 0.71  | 0.34 | 0.71      | 0.34 |
| TPV                                   | 0.44    | 0.36 | 0.50  | 0.35 | 0.45  | 0.34 | 0.48  | 0.30 | 0.52  | 0.28 | 0.64  | 0.22 | 0.51      | 0.31 |
| AVG                                   | 0.70    | 0.26 | 0.72  | 0.25 | 0.69  | 0.27 | 0.68  | 0.28 | 0.68  | 0.27 | 0.65  | 0.31 | 0.69      | 0.27 |
| Nucleoside / Nucleotide RT Inhibitors |         |      |       |      |       |      |       |      |       |      |       |      |           |      |
| 3TC                                   | 0.96    | 0.04 | 0.95  | 0.05 | 0.96  | 0.04 | 0.90  | 0.18 | 0.90  | 0.12 | 0.90  | 0.18 | 0.93      | 0.10 |
| ABC                                   | 0.77    | 0.04 | 0.75  | 0.04 | 0.78  | 0.04 | 0.73  | 0.04 | 0.74  | 0.04 | 0.65  | 0.06 | 0.74      | 0.04 |
| AZT                                   | 0.67    | 0.38 | 0.70  | 0.36 | 0.61  | 0.45 | 0.74  | 0.29 | 0.72  | 0.32 | 0.65  | 0.41 | 0.68      | 0.37 |
| d4T                                   | 0.70    | 0.03 | 0.70  | 0.03 | 0.70  | 0.03 | 0.71  | 0.03 | 0.70  | 0.03 | 0.75  | 0.02 | 0.71      | 0.03 |
| ddC                                   | 0.64    | 0.04 | 0.62  | 0.04 | 0.63  | 0.04 | 0.67  | 0.04 | 0.60  | 0.05 | 0.65  | 0.04 | 0.64      | 0.04 |
| ddI                                   | 0.73    | 0.02 | 0.73  | 0.02 | 0.67  | 0.02 | 0.70  | 0.02 | 0.74  | 0.02 | 0.65  | 0.02 | 0.70      | 0.02 |
| FTC                                   | 0.98    | 0.03 | 0.97  | 0.04 | 0.98  | 0.03 | 0.76  | 0.31 | 0.64  | 0.50 | 0.89  | 0.15 | 0.87      | 0.18 |
| TDF                                   | 0.48    | 0.05 | 0.50  | 0.05 | 0.26  | 0.07 | 0.50  | 0.05 | 0.55  | 0.04 | 0.18  | 0.08 | 0.41      | 0.06 |
| AVG                                   | 0.74    | 0.08 | 0.74  | 0.08 | 0.70  | 0.09 | 0.71  | 0.12 | 0.70  | 0.14 | 0.67  | 0.12 | 0.71      | 0.10 |
| Nonnucleoside RT Inhibitors           |         |      |       |      |       |      |       |      |       |      |       |      |           |      |
| DLV                                   | 0.64    | 0.49 | 0.63  | 0.49 | 0.64  | 0.49 | 0.65  | 0.49 | 0.57  | 0.58 | 0.68  | 0.44 | 0.64      | 0.50 |
| EFV                                   | 0.72    | 0.37 | 0.75  | 0.35 | 0.72  | 0.38 | 0.68  | 0.44 | 0.58  | 0.58 | 0.67  | 0.46 | 0.69      | 0.43 |
| NVP                                   | 0.76    | 0.40 | 0.78  | 0.37 | 0.77  | 0.38 | 0.76  | 0.41 | 0.59  | 0.69 | 0.73  | 0.46 | 0.73      | 0.45 |
| AVG                                   | 0.71    | 0.42 | 0.72  | 0.40 | 0.71  | 0.42 | 0.70  | 0.45 | 0.58  | 0.62 | 0.69  | 0.45 | 0.69      | 0.46 |
